# Supplementary material for: Climate change and intensive land use reduce soil animal biomass via dissimilar pathways
Source: eLife. 2020 Jul 28;9:e54749. doi: 10.7554/eLife.54749 (PMC7386910; doi:10.7554/eLife.54749)
Supplement: Table 1—source data 2. [file elife-54749-table1-data2.csv]

Date	Plot_ID	Subplot	Mainplot	Climate	Landuse	Microarthropods_D	Coll_D	Isot_D	Ento_D	Kati_D	Smin_D	Onyc_D	Hypo_D	Acar_D	Orib_D	Meso_D	Pros_D
fall_2015	1_1	1	1	A	4EM	9851.380042	5605.095541	4246.284501	339.7027601	339.7027601	0	679.4055202	0	4246.284501	3057.324841	1188.95966	0
fall_2015	1_2	2	1	A	1CF	4246.284501	2547.770701	1358.81104	0	679.4055202	0	509.5541401	0	1698.5138	1019.10828	679.4055202	0
fall_2015	1_3	3	1	A	5EP	9511.677282	2717.622081	2547.770701	169.85138	0	0	0	0	6794.055202	6284.501062	509.5541401	0
fall_2015	1_4	4	1	A	2OF	6454.352442	2208.067941	849.2569002	0	679.4055202	0	679.4055202	0	4246.284501	3566.878981	679.4055202	0
fall_2015	1_5	5	1	A	3IM	10360.93418	679.4055202	509.5541401	0	0	0	169.85138	0	9681.528662	7133.757962	2547.770701	0
fall_2015	2_1	6	2	F	3IM	8152.866242	1358.81104	849.2569002	169.85138	0	169.85138	169.85138	0	6794.055202	4246.284501	2547.770701	0
fall_2015	2_2	7	2	F	5EP	6114.649682	1019.10828	849.2569002	0	169.85138	0	0	0	5095.541401	3736.730361	1358.81104	0
fall_2015	2_3	8	2	F	2OF	2377.919321	679.4055202	509.5541401	0	169.85138	0	0	0	1698.5138	1019.10828	679.4055202	0
fall_2015	2_4	9	2	F	1CF	1358.81104	679.4055202	679.4055202	0	0	0	0	0	679.4055202	339.7027601	339.7027601	0
fall_2015	2_5	10	2	F	4EM	4246.284501	1188.95966	339.7027601	169.85138	0	0	679.4055202	0	3057.324841	2377.919321	679.4055202	0
fall_2015	3_1	11	3	A	1CF	9002.123142	2547.770701	1528.66242	169.85138	509.5541401	0	339.7027601	0	6454.352442	4416.135881	2038.216561	0
fall_2015	3_2	12	3	A	2OF	6284.501062	1868.36518	1528.66242	0	169.85138	0	169.85138	0	4416.135881	1698.5138	2717.622081	0
fall_2015	3_3	13	3	A	3IM	8832.271762	6794.055202	4755.838641	509.5541401	509.5541401	0	1019.10828	0	2038.216561	1019.10828	1019.10828	0
fall_2015	3_4	14	3	A	4EM	13078.55626	8832.271762	6454.352442	1019.10828	0	1188.95966	169.85138	0	4246.284501	2547.770701	1698.5138	0
fall_2015	3_5	15	3	A	5EP	12059.44798	7813.163482	5944.798301	0	509.5541401	339.7027601	849.2569002	169.85138	4246.284501	1358.81104	2887.473461	0
fall_2015	4_1	16	4	F	1CF	6624.203822	4076.433121	2547.770701	0	0	0	1528.66242	0	2547.770701	1698.5138	849.2569002	0
fall_2015	4_2	17	4	F	2OF	14097.66454	1358.81104	1019.10828	0	169.85138	0	169.85138	0	12738.8535	10700.63694	2038.216561	0
fall_2015	4_3	18	4	F	3IM	9002.123142	1358.81104	169.85138	339.7027601	679.4055202	0	169.85138	0	7643.312102	6454.352442	1188.95966	0
fall_2015	4_4	19	4	F	4EM	4076.433121	1528.66242	339.7027601	0	509.5541401	0	679.4055202	0	2547.770701	1698.5138	849.2569002	0
fall_2015	4_5	20	4	F	5EP	2887.473461	1358.81104	849.2569002	0	0	0	509.5541401	0	1528.66242	509.5541401	1019.10828	0
fall_2015	5_1	21	5	A	2OF	2547.770701	679.4055202	509.5541401	0	0	0	169.85138	0	1868.36518	1188.95966	679.4055202	0
fall_2015	5_2	22	5	A	3IM	3566.878981	679.4055202	339.7027601	0	339.7027601	0	0	0	2887.473461	1358.81104	1528.66242	0
fall_2015	5_3	23	5	A	1CF	7133.757962	849.2569002	509.5541401	0	0	0	339.7027601	0	6284.501062	3736.730361	2547.770701	0
fall_2015	5_4	24	5	A	5EP	1698.5138	339.7027601	169.85138	0	0	0	169.85138	0	1358.81104	339.7027601	1019.10828	0
fall_2015	5_5	25	5	A	4EM	3566.878981	1528.66242	1188.95966	0	339.7027601	0	0	0	2038.216561	1019.10828	1019.10828	0
fall_2015	6_1	26	5	F	5EP	2208.067941	339.7027601	339.7027601	0	0	0	0	0	1868.36518	509.5541401	1358.81104	0
fall_2015	6_2	27	5	F	1CF	4755.838641	509.5541401	0	0	509.5541401	0	0	0	4246.284501	2038.216561	2208.067941	0
fall_2015	6_3	28	5	F	4EM	4925.690021	1358.81104	1358.81104	0	0	0	0	0	3566.878981	2208.067941	1358.81104	0
fall_2015	6_4	29	5	F	2OF	509.5541401	0	0	0	0	0	0	0	509.5541401	339.7027601	169.85138	0
fall_2015	6_5	30	5	F	3IM	6963.906582	1528.66242	509.5541401	0	169.85138	0	849.2569002	0	5435.244161	1868.36518	3566.878981	0
fall_2015	7_1	31	7	F	2OF	5944.798301	1698.5138	1358.81104	0	339.7027601	0	0	0	4246.284501	3906.581741	339.7027601	0
fall_2015	7_2	32	7	F	4EM	31422.50531	1868.36518	1019.10828	0	169.85138	0	679.4055202	0	29554.14013	24798.30149	3906.581741	849.2569002
fall_2015	7_3	33	7	F	5EP	5435.244161	1868.36518	1188.95966	0	0	0	339.7027601	339.7027601	3566.878981	2547.770701	1019.10828	0
fall_2015	7_4	34	7	F	3IM	5095.541401	509.5541401	169.85138	0	339.7027601	0	0	0	4585.987261	2887.473461	1698.5138	0
fall_2015	7_5	35	7	F	1CF	1019.10828	169.85138	169.85138	0	0	0	0	0	849.2569002	339.7027601	509.5541401	0
fall_2015	8_1	36	8	A	3IM	14437.3673	3057.324841	679.4055202	0	1698.5138	0	679.4055202	0	11380.04246	8152.866242	3227.176221	0
fall_2015	8_2	37	8	A	5EP	5944.798301	1868.36518	1358.81104	0	169.85138	0	339.7027601	0	4076.433121	3057.324841	1019.10828	0
fall_2015	8_3	38	8	A	4EM	6963.906582	0	0	0	0	0	0	0	6963.906582	4755.838641	2208.067941	0
fall_2015	8_4	39	8	A	1CF	4416.135881	509.5541401	169.85138	169.85138	169.85138	0	0	0	3906.581741	2547.770701	1358.81104	0
fall_2015	8_5	40	8	A	2OF	3227.176221	2377.919321	1868.36518	0	0	0	509.5541401	0	849.2569002	509.5541401	339.7027601	0
fall_2015	9_1	41	9	F	4EM	20891.71975	4585.987261	2887.473461	0	1358.81104	0	339.7027601	0	16305.73248	5774.946921	10530.78556	0
fall_2015	9_2	42	9	F	3IM	6794.055202	1868.36518	1188.95966	0	339.7027601	0	339.7027601	0	4925.690021	3057.324841	1868.36518	0
fall_2015	9_3	43	9	F	1CF	1358.81104	339.7027601	339.7027601	0	0	0	0	0	1019.10828	849.2569002	169.85138	0
fall_2015	9_4	44	9	F	5EP	5944.798301	509.5541401	509.5541401	0	0	0	0	0	5435.244161	3566.878981	1868.36518	0
fall_2015	9_5	45	9	F	2OF	5265.392781	679.4055202	169.85138	0	339.7027601	0	169.85138	0	4585.987261	3566.878981	1019.10828	0
fall_2015	10_1	46	10	A	5EP	2208.067941	1188.95966	679.4055202	0	509.5541401	0	0	0	1019.10828	0	1019.10828	0
fall_2015	10_2	47	10	A	4EM	8322.717622	2038.216561	849.2569002	169.85138	0	0	1019.10828	0	6284.501062	3227.176221	3057.324841	0
fall_2015	10_3	48	10	A	2OF	7813.163482	2887.473461	2377.919321	0	339.7027601	0	169.85138	0	4925.690021	3906.581741	1019.10828	0
fall_2015	10_4	49	10	A	3IM	6284.501062	2547.770701	1868.36518	0	0	0	679.4055202	0	3736.730361	2547.770701	1188.95966	0
fall_2015	10_5	50	10	A	1CF	5435.244161	2717.622081	2208.067941	0	339.7027601	0	169.85138	0	2717.622081	1528.66242	1188.95966	0
spring_2016	1_1	1	1	A	4EM	7303.609342	169.85138	169.85138	0	0	0	0	0	7133.757962	3057.324841	4076.433121	0
spring_2016	1_2	2	1	A	1CF	3566.878981	339.7027601	339.7027601	0	0	0	0	0	3227.176221	2377.919321	849.2569002	0
spring_2016	1_3	3	1	A	5EP	5944.798301	1019.10828	679.4055202	0	0	339.7027601	0	0	4925.690021	2208.067941	2717.622081	0
spring_2016	1_4	4	1	A	2OF	8492.569002	3227.176221	1528.66242	0	339.7027601	0	1019.10828	339.7027601	5265.392781	2717.622081	2547.770701	0
spring_2016	1_5	5	1	A	3IM	9511.677282	339.7027601	169.85138	0	169.85138	0	0	0	9171.974522	6454.352442	2717.622081	0
spring_2016	2_1	6	2	F	3IM	4246.284501	0	0	0	0	0	0	0	4246.284501	2547.770701	1698.5138	0
spring_2016	2_2	7	2	F	5EP	5265.392781	169.85138	0	0	169.85138	0	0	0	5095.541401	3057.324841	2038.216561	0
spring_2016	2_3	8	2	F	2OF	4585.987261	509.5541401	339.7027601	0	0	0	169.85138	0	4076.433121	2547.770701	1528.66242	0
spring_2016	2_4	9	2	F	1CF	6284.501062	1019.10828	679.4055202	0	169.85138	0	169.85138	0	5265.392781	3736.730361	1528.66242	0
spring_2016	2_5	10	2	F	4EM	4416.135881	169.85138	169.85138	0	0	0	0	0	4246.284501	2377.919321	1698.5138	169.85138
spring_2016	3_1	11	3	A	1CF	5435.244161	2377.919321	1698.5138	0	0	0	339.7027601	339.7027601	3057.324841	1868.36518	1188.95966	0
spring_2016	3_2	12	3	A	2OF	3057.324841	1528.66242	1019.10828	0	0	0	169.85138	339.7027601	1528.66242	849.2569002	509.5541401	169.85138
spring_2016	3_3	13	3	A	3IM	6794.055202	339.7027601	339.7027601	0	0	0	0	0	6454.352442	4925.690021	1528.66242	0
spring_2016	3_4	14	3	A	4EM	3227.176221	339.7027601	169.85138	0	169.85138	0	0	0	2887.473461	1528.66242	1358.81104	0
spring_2016	3_5	15	3	A	5EP	3397.027601	339.7027601	339.7027601	0	0	0	0	0	3057.324841	1868.36518	1188.95966	0
spring_2016	4_1	16	4	F	1CF	4925.690021	339.7027601	339.7027601	0	0	0	0	0	4585.987261	2887.473461	1528.66242	169.85138
spring_2016	4_2	17	4	F	2OF	5435.244161	2717.622081	1358.81104	0	169.85138	0	849.2569002	339.7027601	2717.622081	1868.36518	849.2569002	0
spring_2016	4_3	18	4	F	3IM	12399.15074	169.85138	169.85138	0	0	0	0	0	12229.29936	9511.677282	2717.622081	0
spring_2016	4_4	19	4	F	4EM	5774.946921	169.85138	0	0	0	0	0	169.85138	5605.095541	2038.216561	3566.878981	0
spring_2016	4_5	20	4	F	5EP	7303.609342	679.4055202	339.7027601	0	169.85138	0	0	169.85138	6624.203822	3906.581741	2717.622081	0
spring_2016	5_1	21	5	A	2OF	4416.135881	1358.81104	679.4055202	0	169.85138	0	509.5541401	0	3057.324841	2038.216561	1019.10828	0
spring_2016	5_2	22	5	A	3IM	3566.878981	509.5541401	339.7027601	169.85138	0	0	0	0	3057.324841	2717.622081	339.7027601	0
spring_2016	5_3	23	5	A	1CF	6454.352442	2208.067941	1868.36518	169.85138	0	0	169.85138	0	4246.284501	2887.473461	1358.81104	0
spring_2016	5_4	24	5	A	5EP	7473.460722	169.85138	169.85138	0	0	0	0	0	7303.609342	3566.878981	3736.730361	0
spring_2016	5_5	25	5	A	4EM	8152.866242	509.5541401	509.5541401	0	0	0	0	0	7643.312102	4755.838641	2887.473461	0
spring_2016	6_1	26	5	F	5EP	2717.622081	339.7027601	339.7027601	0	0	0	0	0	2377.919321	509.5541401	1868.36518	0
spring_2016	6_2	27	5	F	1CF	3566.878981	1528.66242	1358.81104	0	169.85138	0	0	0	2038.216561	1698.5138	339.7027601	0
spring_2016	6_3	28	5	F	4EM	2377.919321	169.85138	0	0	0	0	169.85138	0	2208.067941	1188.95966	1019.10828	0
spring_2016	6_4	29	5	F	2OF	7643.312102	2717.622081	2208.067941	0	169.85138	0	0	339.7027601	4925.690021	2887.473461	2038.216561	0
spring_2016	6_5	30	5	F	3IM	6963.906582	679.4055202	339.7027601	0	0	0	0	339.7027601	6284.501062	4585.987261	1698.5138	0
spring_2016	7_1	31	7	F	2OF	2547.770701	509.5541401	509.5541401	0	0	0	0	0	2038.216561	1528.66242	509.5541401	0
spring_2016	7_2	32	7	F	4EM	3227.176221	169.85138	169.85138	0	0	0	0	0	3057.324841	1698.5138	1358.81104	0
spring_2016	7_3	33	7	F	5EP	1019.10828	0	0	0	0	0	0	0	1019.10828	509.5541401	509.5541401	0
spring_2016	7_4	34	7	F	3IM	3566.878981	679.4055202	679.4055202	0	0	0	0	0	2887.473461	2377.919321	509.5541401	0
spring_2016	7_5	35	7	F	1CF	2038.216561	339.7027601	339.7027601	0	0	0	0	0	1698.5138	509.5541401	1188.95966	0
spring_2016	8_1	36	8	A	3IM	5095.541401	169.85138	0	0	0	0	169.85138	0	4925.690021	2208.067941	2717.622081	0
spring_2016	8_2	37	8	A	5EP	4246.284501	339.7027601	339.7027601	0	0	0	0	0	3906.581741	2038.216561	1868.36518	0
spring_2016	8_3	38	8	A	4EM	3736.730361	509.5541401	509.5541401	0	0	0	0	0	3227.176221	2377.919321	849.2569002	0
spring_2016	8_4	39	8	A	1CF	3397.027601	1698.5138	1188.95966	169.85138	169.85138	0	169.85138	0	1698.5138	849.2569002	849.2569002	0
spring_2016	8_5	40	8	A	2OF	2887.473461	1188.95966	1019.10828	0	0	0	169.85138	0	1698.5138	679.4055202	1019.10828	0
spring_2016	9_1	41	9	F	4EM	3566.878981	339.7027601	339.7027601	0	0	0	0	0	3227.176221	1868.36518	1358.81104	0
spring_2016	9_2	42	9	F	3IM	5095.541401	1019.10828	849.2569002	0	169.85138	0	0	0	4076.433121	2887.473461	1188.95966	0
spring_2016	9_3	43	9	F	1CF	2377.919321	1188.95966	339.7027601	0	509.5541401	0	339.7027601	0	1188.95966	169.85138	1019.10828	0
spring_2016	9_4	44	9	F	5EP	6794.055202	1868.36518	679.4055202	0	1188.95966	0	0	0	4925.690021	1698.5138	3227.176221	0
spring_2016	9_5	45	9	F	2OF	3736.730361	1698.5138	1528.66242	0	0	0	0	169.85138	2038.216561	509.5541401	1528.66242	0
spring_2016	10_1	46	10	A	5EP	4585.987261	1358.81104	509.5541401	169.85138	0	0	339.7027601	339.7027601	3227.176221	1019.10828	2208.067941	0
spring_2016	10_2	47	10	A	4EM	3227.176221	679.4055202	339.7027601	169.85138	169.85138	0	0	0	2547.770701	849.2569002	1698.5138	0
spring_2016	10_3	48	10	A	2OF	4585.987261	2547.770701	1868.36518	339.7027601	169.85138	0	0	169.85138	2038.216561	1019.10828	1019.10828	0
spring_2016	10_4	49	10	A	3IM	7643.312102	1188.95966	849.2569002	0	169.85138	0	0	169.85138	6454.352442	3906.581741	2547.770701	0
spring_2016	10_5	50	10	A	1CF	5435.244161	2547.770701	1528.66242	0	339.7027601	0	679.4055202	0	2887.473461	1868.36518	1019.10828	0
fall_2016	1_1	1	1	A	4EM	12569.00212	2887.473461	1528.66242	1019.10828	0	0	339.7027601	0	9681.528662	8152.866242	0	1528.66242
fall_2016	1_2	2	1	A	1CF	4755.838641	339.7027601	0	0	0	169.85138	169.85138	0	4416.135881	3736.730361	339.7027601	339.7027601
fall_2016	1_3	3	1	A	5EP	8832.271762	169.85138	0	0	0	0	169.85138	0	8662.420382	7813.163482	169.85138	679.4055202
fall_2016	1_4	4	1	A	2OF	5265.392781	1188.95966	849.2569002	0	0	169.85138	169.85138	0	4076.433121	2717.622081	679.4055202	679.4055202
fall_2016	1_5	5	1	A	3IM	13757.96178	509.5541401	0	0	339.7027601	169.85138	0	0	13248.40764	12908.70488	169.85138	169.85138
fall_2016	2_1	6	2	F	3IM	9341.825902	4076.433121	679.4055202	0	509.5541401	2208.067941	679.4055202	0	5265.392781	4076.433121	169.85138	1019.10828
fall_2016	2_2	7	2	F	5EP	6284.501062	169.85138	169.85138	0	0	0	0	0	6114.649682	4246.284501	509.5541401	1358.81104
fall_2016	2_3	8	2	F	2OF	4416.135881	2208.067941	509.5541401	339.7027601	0	849.2569002	509.5541401	0	2208.067941	1698.5138	169.85138	339.7027601
fall_2016	2_4	9	2	F	1CF	2377.919321	0	0	0	0	0	0	0	2377.919321	1868.36518	339.7027601	169.85138
fall_2016	2_5	10	2	F	4EM	18343.94904	3906.581741	1868.36518	1528.66242	0	509.5541401	0	0	14437.3673	12229.29936	679.4055202	1528.66242
fall_2016	3_1	11	3	A	1CF	4755.838641	849.2569002	169.85138	339.7027601	339.7027601	0	0	0	3906.581741	3397.027601	0	509.5541401
fall_2016	3_2	12	3	A	2OF	5944.798301	679.4055202	339.7027601	0	339.7027601	0	0	0	5265.392781	4585.987261	339.7027601	339.7027601
fall_2016	3_3	13	3	A	3IM	13757.96178	5265.392781	679.4055202	2038.216561	509.5541401	2038.216561	0	0	8492.569002	6454.352442	1019.10828	1019.10828
fall_2016	3_4	14	3	A	4EM	8662.420382	2377.919321	0	849.2569002	849.2569002	339.7027601	339.7027601	0	6284.501062	4076.433121	1358.81104	849.2569002
fall_2016	3_5	15	3	A	5EP	14946.92144	2717.622081	849.2569002	1528.66242	339.7027601	0	0	0	12229.29936	10191.0828	1528.66242	509.5541401
fall_2016	4_1	16	4	F	1CF	6963.906582	1188.95966	509.5541401	0	169.85138	0	339.7027601	169.85138	5774.946921	3906.581741	1188.95966	679.4055202
fall_2016	4_2	17	4	F	2OF	2038.216561	0	0	0	0	0	0	0	2038.216561	1188.95966	0	849.2569002
fall_2016	4_3	18	4	F	3IM	8322.717622	1358.81104	0	169.85138	849.2569002	169.85138	169.85138	0	6963.906582	5774.946921	339.7027601	849.2569002
fall_2016	4_4	19	4	F	4EM	18343.94904	5944.798301	4585.987261	849.2569002	169.85138	169.85138	169.85138	0	12399.15074	9002.123142	2547.770701	849.2569002
fall_2016	4_5	20	4	F	5EP	6624.203822	509.5541401	0	0	509.5541401	0	0	0	6114.649682	4755.838641	509.5541401	849.2569002
fall_2016	5_1	21	5	A	2OF	1188.95966	0	0	0	0	0	0	0	1188.95966	509.5541401	339.7027601	339.7027601
fall_2016	5_2	22	5	A	3IM	22080.67941	7983.014862	2547.770701	2717.622081	849.2569002	1698.5138	169.85138	0	14097.66454	8662.420382	2717.622081	2717.622081
fall_2016	5_3	23	5	A	1CF	3397.027601	849.2569002	849.2569002	0	0	0	0	0	2547.770701	1188.95966	339.7027601	1019.10828
fall_2016	5_4	24	5	A	5EP	14267.51592	2717.622081	1358.81104	679.4055202	339.7027601	169.85138	0	169.85138	11549.89384	8662.420382	2038.216561	849.2569002
fall_2016	5_5	25	5	A	4EM	13588.1104	1188.95966	169.85138	339.7027601	339.7027601	169.85138	169.85138	0	12399.15074	6963.906582	4076.433121	1358.81104
fall_2016	6_1	26	5	F	5EP	3736.730361	169.85138	0	0	169.85138	0	0	0	3566.878981	3397.027601	0	169.85138
fall_2016	6_2	27	5	F	1CF	5605.095541	169.85138	169.85138	0	0	0	0	0	5435.244161	3736.730361	1528.66242	169.85138
fall_2016	6_3	28	5	F	4EM	7473.460722	1698.5138	0	1188.95966	169.85138	339.7027601	0	0	5774.946921	2547.770701	2547.770701	679.4055202
fall_2016	6_4	29	5	F	2OF	17664.54352	1528.66242	849.2569002	339.7027601	339.7027601	0	0	0	16135.8811	12059.44798	2717.622081	1358.81104
fall_2016	6_5	30	5	F	3IM	14437.3673	2377.919321	169.85138	0	339.7027601	1868.36518	0	0	12059.44798	10360.93418	1188.95966	509.5541401
fall_2016	7_1	31	7	F	2OF	3566.878981	0	0	0	0	0	0	0	3566.878981	2377.919321	1019.10828	169.85138
fall_2016	7_2	32	7	F	4EM	4755.838641	849.2569002	509.5541401	0	0	339.7027601	0	0	3906.581741	679.4055202	2717.622081	509.5541401
fall_2016	7_3	33	7	F	5EP	6624.203822	1528.66242	509.5541401	169.85138	849.2569002	0	0	0	5095.541401	4246.284501	679.4055202	169.85138
fall_2016	7_4	34	7	F	3IM	11549.89384	1188.95966	0	169.85138	679.4055202	169.85138	169.85138	0	10360.93418	8492.569002	849.2569002	1019.10828
fall_2016	7_5	35	7	F	1CF	1358.81104	339.7027601	169.85138	169.85138	0	0	0	0	1019.10828	849.2569002	169.85138	0
fall_2016	8_1	36	8	A	3IM	7473.460722	2038.216561	0	169.85138	849.2569002	849.2569002	169.85138	0	5435.244161	3906.581741	339.7027601	1188.95966
fall_2016	8_2	37	8	A	5EP	13418.25902	1698.5138	509.5541401	509.5541401	339.7027601	0	339.7027601	0	11719.74522	7643.312102	2208.067941	1868.36518
fall_2016	8_3	38	8	A	4EM	16645.43524	1019.10828	849.2569002	169.85138	0	0	0	0	15626.32696	12908.70488	679.4055202	2038.216561
fall_2016	8_4	39	8	A	1CF	6284.501062	1698.5138	509.5541401	679.4055202	0	0	509.5541401	0	4585.987261	3397.027601	679.4055202	509.5541401
fall_2016	8_5	40	8	A	2OF	3227.176221	1358.81104	1019.10828	169.85138	169.85138	0	0	0	1868.36518	1358.81104	509.5541401	0
fall_2016	9_1	41	9	F	4EM	8832.271762	1019.10828	169.85138	509.5541401	339.7027601	0	0	0	7813.163482	6794.055202	339.7027601	679.4055202
fall_2016	9_2	42	9	F	3IM	10870.48832	2377.919321	0	339.7027601	849.2569002	679.4055202	509.5541401	0	8492.569002	6963.906582	679.4055202	849.2569002
fall_2016	9_3	43	9	F	1CF	3566.878981	169.85138	0	0	0	0	169.85138	0	3397.027601	3057.324841	339.7027601	0
fall_2016	9_4	44	9	F	5EP	26496.81529	5774.946921	509.5541401	1528.66242	849.2569002	2377.919321	339.7027601	169.85138	20721.86837	16645.43524	1528.66242	2547.770701
fall_2016	9_5	45	9	F	2OF	1698.5138	169.85138	0	0	0	0	169.85138	0	1528.66242	1358.81104	0	169.85138
fall_2016	10_1	46	10	A	5EP	12059.44798	1528.66242	0	849.2569002	0	0	679.4055202	0	10530.78556	7643.312102	1528.66242	1358.81104
fall_2016	10_2	47	10	A	4EM	18853.50318	2377.919321	339.7027601	1868.36518	0	169.85138	0	0	16475.58386	12059.44798	2547.770701	1868.36518
fall_2016	10_3	48	10	A	2OF	7473.460722	849.2569002	679.4055202	0	0	0	169.85138	0	6624.203822	4925.690021	339.7027601	1358.81104
fall_2016	10_4	49	10	A	3IM	14607.21868	2038.216561	509.5541401	339.7027601	0	339.7027601	169.85138	679.4055202	12569.00212	11889.5966	0	679.4055202
fall_2016	10_5	50	10	A	1CF	19532.9087	2377.919321	509.5541401	679.4055202	0	1188.95966	0	0	17154.98938	15456.47558	1188.95966	509.5541401
