# Supplementary material for: Climate change and intensive land use reduce soil animal biomass via dissimilar pathways
Source: eLife. 2020 Jul 28;9:e54749. doi: 10.7554/eLife.54749 (PMC7386910; doi:10.7554/eLife.54749)
Supplement: Table 1—source data 3. [file elife-54749-table1-data3.csv]

Date	Plot_ID	Subplot	Mainplot	Climate	Landuse	Microarthropods_B	Coll_B	Isot_B	Ento_B	Kati_B	Smin_B	Onyc_B	Hypo_B	Acar_B	Orib_B	Meso_B	Pros_B
fall_2015	1_1	1	1	A	4EM	220.5255599	95.04500133	73.31324964	4.659718029	NA	NA	17.07203366	NA	125.4805586	69.89998249	55.58057606	NA
fall_2015	1_2	2	1	A	1CF	53.35146726	20.52530753	14.98928471	NA	NA	NA	5.536022814	NA	32.82615973	9.714996464	23.11116326	NA
fall_2015	1_3	3	1	A	5EP	188.4223534	49.35393941	36.80006174	12.55387768	NA	NA	NA	NA	139.068414	124.7314566	14.33695737	NA
fall_2015	1_4	4	1	A	2OF	91.87288752	14.87986121	11.55419192	NA	NA	NA	3.325669286	NA	76.99302631	51.61360091	25.3794254	NA
fall_2015	1_5	5	1	A	3IM	90.3371622	4.437964017	3.501233869	NA	NA	NA	0.936730148	NA	85.89919819	55.54200095	30.35719723	NA
fall_2015	2_1	6	2	F	3IM	70.12974422	16.13420819	7.214839466	6.904307274	NA	NA	2.015061445	NA	53.99553604	26.94994134	27.04559469	NA
fall_2015	2_2	7	2	F	5EP	54.27151948	11.45292767	11.45292767	NA	NA	NA	NA	NA	42.81859181	25.38486188	17.43372992	NA
fall_2015	2_3	8	2	F	2OF	33.16779601	5.240910415	5.240910415	NA	NA	NA	NA	NA	27.92688559	16.27053904	11.65634656	NA
fall_2015	2_4	9	2	F	1CF	16.3074261	6.277569956	6.277569956	NA	NA	NA	NA	NA	10.02985615	4.622485004	5.407371144	NA
fall_2015	2_5	10	2	F	4EM	67.47232852	11.61134594	0.792045273	2.290585534	NA	NA	8.528715131	NA	55.86098258	38.85826956	17.00271302	NA
fall_2015	3_1	11	3	A	1CF	138.9259444	26.71380206	21.45437104	3.161040877	NA	NA	2.098390143	NA	112.2121423	81.82347466	30.38866766	NA
fall_2015	3_2	12	3	A	2OF	70.49974876	10.31575958	8.240060046	NA	NA	NA	2.075699529	NA	60.18398919	22.73315087	37.45083831	NA
fall_2015	3_3	13	3	A	3IM	83.9587026	46.96224031	37.29942251	1.300822187	NA	NA	8.36199562	NA	36.99646229	9.471040809	27.52542148	NA
fall_2015	3_4	14	3	A	4EM	143.7309134	79.57267192	65.99876354	13.23709503	NA	NA	0.33681335	NA	64.15824151	22.84747055	41.31077096	NA
fall_2015	3_5	15	3	A	5EP	117.1190714	38.21888948	32.21961337	NA	0.275344451	0.691995415	5.031936239	NA	78.90018193	13.1086973	65.79148463	NA
fall_2015	4_1	16	4	F	1CF	60.7067418	25.10581532	12.43635039	NA	NA	NA	12.66946493	NA	35.60092648	24.6221372	10.97878929	NA
fall_2015	4_2	17	4	F	2OF	209.5303833	12.947203	11.17858648	NA	NA	NA	1.76861652	NA	196.5831803	152.8246982	43.7584821	NA
fall_2015	4_3	18	4	F	3IM	115.678774	10.37129534	3.948691866	3.037485578	NA	NA	3.3851179	NA	105.3074787	73.96716679	31.3403119	NA
fall_2015	4_4	19	4	F	4EM	57.43503656	6.195140092	2.067336222	NA	NA	NA	4.12780387	NA	51.23989647	27.23080391	24.00909256	NA
fall_2015	4_5	20	4	F	5EP	46.00849333	19.89807351	16.61371132	NA	NA	NA	3.284362196	NA	26.11041982	3.906413096	22.20400673	NA
fall_2015	5_1	21	5	A	2OF	28.82018491	4.397328485	3.33247547	NA	NA	NA	1.064853015	NA	24.42285642	12.85071859	11.57213783	NA
fall_2015	5_2	22	5	A	3IM	52.41502959	1.355572881	1.355572881	NA	NA	NA	NA	NA	51.05945671	16.46509075	34.59436597	NA
fall_2015	5_3	23	5	A	1CF	85.47682513	7.263308135	2.038776743	NA	NA	NA	5.224531392	NA	78.21351699	35.70437536	42.50914163	NA
fall_2015	5_4	24	5	A	5EP	26.35609474	5.553796272	2.927000961	NA	NA	NA	2.626795311	NA	20.80229846	3.728343384	17.07395508	NA
fall_2015	5_5	25	5	A	4EM	41.66927378	5.495560675	5.495560675	NA	NA	NA	NA	NA	36.17371311	15.60054155	20.57317155	NA
fall_2015	6_1	26	5	F	5EP	26.13157509	4.766413609	4.766413609	NA	NA	NA	NA	NA	21.36516148	1.270954325	20.09420716	NA
fall_2015	6_2	27	5	F	1CF	79.3999758	NA	NA	NA	NA	NA	NA	NA	79.3999758	22.56354239	56.83643341	NA
fall_2015	6_3	28	5	F	4EM	51.07258536	11.81100026	11.81100026	NA	NA	NA	NA	NA	39.2615851	19.91943745	19.34214766	NA
fall_2015	6_4	29	5	F	2OF	9.578061022	NA	NA	NA	NA	NA	NA	NA	9.578061022	7.207722004	2.370339018	NA
fall_2015	6_5	30	5	F	3IM	123.195851	7.471252063	4.838614865	NA	NA	NA	2.632637197	NA	115.7245989	21.70366323	94.0209357	NA
fall_2015	7_1	31	7	F	2OF	62.59762408	16.29136987	16.29136987	NA	NA	NA	NA	NA	46.30625421	35.80966916	10.49658506	NA
fall_2015	7_2	32	7	F	4EM	548.8152935	20.96433121	10.15199259	NA	NA	NA	10.81233862	NA	515.9843739	471.0417766	44.94259734	11.86658837
fall_2015	7_3	33	7	F	5EP	64.75021501	16.85980761	13.02730784	NA	NA	NA	3.83249977	NA	47.8904074	22.85505689	25.03535051	NA
fall_2015	7_4	34	7	F	3IM	73.16365718	1.030235437	1.030235437	NA	NA	NA	NA	NA	72.13342175	22.28144613	49.85197561	NA
fall_2015	7_5	35	7	F	1CF	8.210824972	3.239136879	3.239136879	NA	NA	NA	NA	NA	4.971688093	0.665582035	4.306106058	NA
fall_2015	8_1	36	8	A	3IM	201.9313584	22.89203336	20.67023572	NA	NA	NA	2.221797646	NA	179.0393251	129.2453714	49.79395366	NA
fall_2015	8_2	37	8	A	5EP	36.22297659	8.885296714	6.727534009	NA	NA	NA	2.157762705	NA	27.33767988	16.32550926	11.01217062	NA
fall_2015	8_3	38	8	A	4EM	40.07790465	NA	NA	NA	NA	NA	NA	NA	40.07790465	27.12694557	12.95095908	NA
fall_2015	8_4	39	8	A	1CF	68.53056401	2.37214626	1.232483541	1.139662719	NA	NA	NA	NA	66.15841775	43.77462319	22.38379456	NA
fall_2015	8_5	40	8	A	2OF	52.82704867	40.53505406	38.8340386	NA	NA	NA	1.70101546	NA	12.2919946	4.433446193	7.858548409	NA
fall_2015	9_1	41	9	F	4EM	135.0614954	32.24551411	28.6646867	NA	NA	NA	3.580827401	NA	102.8159813	35.39897228	67.41700903	NA
fall_2015	9_2	42	9	F	3IM	89.21240643	18.20579823	17.70223622	NA	NA	NA	0.503562008	NA	71.0066082	28.84533691	42.16127129	NA
fall_2015	9_3	43	9	F	1CF	21.94697608	4.35805508	4.35805508	NA	NA	NA	NA	NA	17.588921	15.23344118	2.355479826	NA
fall_2015	9_4	44	9	F	5EP	109.3160373	7.484512619	7.484512619	NA	NA	NA	NA	NA	101.8315247	22.13103555	79.70048914	NA
fall_2015	9_5	45	9	F	2OF	52.13878806	2.585927291	0.268315555	NA	NA	NA	2.317611737	NA	49.55286077	35.77320145	13.77965932	NA
fall_2015	10_1	46	10	A	5EP	47.59815766	38.86470478	38.86470478	NA	NA	NA	NA	NA	8.733452883	NA	8.733452883	NA
fall_2015	10_2	47	10	A	4EM	107.1373952	21.96838919	9.620257821	3.859484873	NA	NA	8.488646501	NA	85.16900603	23.71931247	61.44969357	NA
fall_2015	10_3	48	10	A	2OF	97.26528941	27.57331844	27.09612947	NA	NA	NA	0.477188967	NA	69.69197097	50.90575793	18.78621304	NA
fall_2015	10_4	49	10	A	3IM	57.59479863	15.4547766	14.08677392	NA	NA	NA	1.36800268	NA	42.14002203	30.35719723	11.7828248	NA
fall_2015	10_5	50	10	A	1CF	70.5156731	17.49689195	15.17385346	NA	NA	NA	2.323038488	NA	53.01878115	30.04192355	22.9768576	NA
spring_2016	1_1	1	1	A	4EM	59.76439372	1.157898608	1.157898608	NA	NA	NA	NA	NA	58.60649511	8.789066699	49.81742841	NA
spring_2016	1_2	2	1	A	1CF	41.2688389	12.37552643	12.37552643	NA	NA	NA	NA	NA	28.89331246	21.5414159	7.351896557	NA
spring_2016	1_3	3	1	A	5EP	50.8247477	4.413889687	2.585615671	NA	NA	1.828274016	NA	NA	46.41085801	23.8947642	22.51609382	NA
spring_2016	1_4	4	1	A	2OF	102.36698	18.73071341	7.294240608	NA	0.517588938	NA	9.150938639	1.767945229	83.63626654	13.14239421	70.49387234	NA
spring_2016	1_5	5	1	A	3IM	64.30805842	1.979780456	1.745429732	NA	0.234350724	NA	NA	NA	62.32827797	39.71195117	22.6163268	NA
spring_2016	2_1	6	2	F	3IM	53.65243023	NA	NA	NA	NA	NA	NA	NA	53.65243023	16.13126059	37.52116964	NA
spring_2016	2_2	7	2	F	5EP	59.53576261	0.102147303	NA	NA	0.102147303	NA	NA	NA	59.43361531	25.20483956	34.22877575	NA
spring_2016	2_3	8	2	F	2OF	40.96682208	1.480305525	0.961050099	NA	NA	NA	0.519255426	NA	39.48651656	15.76546952	23.72104703	NA
spring_2016	2_4	9	2	F	1CF	19.2100914	1.228873143	0.85914462	NA	0.066548443	NA	0.303180079	NA	17.98121826	7.660079359	10.3211389	NA
spring_2016	2_5	10	2	F	4EM	25.72108786	0.208478159	0.208478159	NA	NA	NA	NA	NA	24.43534966	14.01761645	10.41773321	1.077260047
spring_2016	3_1	11	3	A	1CF	61.5995298	10.16930704	8.717547588	NA	NA	NA	0.58594583	0.865813627	51.43022275	16.24852292	35.18169983	NA
spring_2016	3_2	12	3	A	2OF	91.86745322	6.67901085	4.613988654	NA	NA	NA	0.604382834	1.460639362	83.41924642	18.63046706	64.78877936	1.769195943
spring_2016	3_3	13	3	A	3IM	67.4833992	0.792045273	0.792045273	NA	NA	NA	NA	NA	66.69135392	41.67509758	25.01625635	NA
spring_2016	3_4	14	3	A	4EM	37.03926622	5.855912978	5.159029947	NA	0.696883031	NA	NA	NA	31.18335325	11.42159022	19.76176302	NA
spring_2016	3_5	15	3	A	5EP	31.25113466	1.771091921	1.771091921	NA	NA	NA	NA	NA	29.48004274	14.40641273	15.07363002	NA
spring_2016	4_1	16	4	F	1CF	55.92760952	14.12219859	14.12219859	NA	NA	NA	NA	NA	38.75872269	16.90073077	21.85799192	3.046688235
spring_2016	4_2	17	4	F	2OF	28.60107606	8.998867822	5.287911421	NA	0.271532515	NA	2.876796562	0.562627324	19.60220824	10.81840803	8.78380021	NA
spring_2016	4_3	18	4	F	3IM	72.12535148	2.644291006	2.644291006	NA	NA	NA	NA	NA	69.48106048	43.5266632	25.95439728	NA
spring_2016	4_4	19	4	F	4EM	67.57640035	0.384139091	NA	NA	NA	NA	NA	0.384139091	67.19226126	18.27494236	48.9173189	NA
spring_2016	4_5	20	4	F	5EP	35.27667952	1.085778253	0.106368616	NA	0.898189699	NA	NA	0.081219939	34.19090127	20.9037592	13.28714207	NA
spring_2016	5_1	21	5	A	2OF	72.81015201	6.182240575	2.870708463	NA	0.207090802	NA	3.10444131	NA	66.62791144	20.53940361	46.08850783	NA
spring_2016	5_2	22	5	A	3IM	58.26685388	4.805138965	0.520735642	4.284403323	NA	NA	NA	NA	53.46171491	48.86849514	4.593219773	NA
spring_2016	5_3	23	5	A	1CF	59.85494094	8.05349497	4.366243758	3.344944009	NA	NA	0.342307203	NA	51.80144597	11.27172197	40.529724	NA
spring_2016	5_4	24	5	A	5EP	86.77211952	1.459617438	1.459617438	NA	NA	NA	NA	NA	85.31250209	33.72726526	51.58523683	NA
spring_2016	5_5	25	5	A	4EM	80.54509484	1.990312974	1.990312974	NA	NA	NA	NA	NA	78.55478187	29.94253827	48.6122436	NA
spring_2016	6_1	26	5	F	5EP	34.92890082	0.136769764	0.136769764	NA	NA	NA	NA	NA	34.79213106	2.473492683	32.31863837	NA
spring_2016	6_2	27	5	F	1CF	53.97316333	16.07743349	15.90583811	NA	0.171595382	NA	NA	NA	37.89572985	13.40753427	24.48819557	NA
spring_2016	6_3	28	5	F	4EM	28.4912153	4.377066093	NA	NA	NA	NA	4.377066093	NA	24.11414921	7.53160559	16.58254362	NA
spring_2016	6_4	29	5	F	2OF	54.13308551	11.42183338	10.7129673	NA	0.029758092	NA	NA	0.679107991	42.71125212	14.3029005	28.40835162	NA
spring_2016	6_5	30	5	F	3IM	95.02780574	2.647401312	1.825070271	NA	NA	NA	NA	0.822331041	92.38040443	41.54088828	50.83951615	NA
spring_2016	7_1	31	7	F	2OF	29.19652022	6.005172572	6.005172572	NA	NA	NA	NA	NA	23.19134764	10.25805891	12.93328873	NA
spring_2016	7_2	32	7	F	4EM	46.58950095	0.192174299	0.192174299	NA	NA	NA	NA	NA	46.39732665	14.84154007	31.55578658	NA
spring_2016	7_3	33	7	F	5EP	14.53737022	NA	NA	NA	NA	NA	NA	NA	14.53737022	8.265146291	6.272223931	NA
spring_2016	7_4	34	7	F	3IM	22.41144908	1.207573489	1.207573489	NA	NA	NA	NA	NA	21.20387559	10.26701821	10.93685739	NA
spring_2016	7_5	35	7	F	1CF	26.37991444	0.102554944	0.102554944	NA	NA	NA	NA	NA	26.2773595	2.715386456	23.56197304	NA
spring_2016	8_1	36	8	A	3IM	63.29670156	1.834461425	NA	NA	NA	NA	1.834461425	NA	61.46224014	16.66014105	44.80209909	NA
spring_2016	8_2	37	8	A	5EP	65.19880162	1.19611895	1.19611895	NA	NA	NA	NA	NA	64.00268267	28.54839747	35.4542852	NA
spring_2016	8_3	38	8	A	4EM	44.5748442	2.581685934	2.581685934	NA	NA	NA	NA	NA	41.99315827	23.09696313	18.89619514	NA
spring_2016	8_4	39	8	A	1CF	86.7767341	21.84289677	17.12649447	3.631873686	0.507687874	NA	0.576840749	NA	64.93383732	5.395523196	59.53831413	NA
spring_2016	8_5	40	8	A	2OF	183.8740885	6.77359778	5.800732792	NA	NA	NA	0.972864988	NA	177.1004908	4.327500499	172.7729903	NA
spring_2016	9_1	41	9	F	4EM	44.59852988	0.108305014	0.108305014	NA	NA	NA	NA	NA	44.49022486	10.69672184	33.79350302	NA
spring_2016	9_2	42	9	F	3IM	80.95186219	8.131974855	6.762597149	NA	1.369377706	NA	NA	NA	72.81988733	40.05798952	32.76189782	NA
spring_2016	9_3	43	9	F	1CF	291.3004522	6.457004825	3.154032987	NA	0.845588402	NA	2.457383435	NA	284.8434473	1.322925878	283.5205215	NA
spring_2016	9_4	44	9	F	5EP	174.420567	6.607039134	4.933730114	NA	1.67330902	NA	NA	NA	167.8135279	27.70299615	140.1105317	NA
spring_2016	9_5	45	9	F	2OF	85.21986892	13.95013265	13.07400305	NA	NA	NA	NA	0.876129598	71.26973626	3.486528279	67.78320799	NA
spring_2016	10_1	46	10	A	5EP	101.9522855	20.65718261	14.94527422	0.854379073	NA	NA	2.312135307	2.545394009	81.2951029	11.86622575	69.42887715	NA
spring_2016	10_2	47	10	A	4EM	40.24399233	2.483889624	0.914895628	1.501714368	0.067279628	NA	NA	NA	37.7601027	5.078402038	32.68170066	NA
spring_2016	10_3	48	10	A	2OF	77.64455554	24.81414895	8.472065973	16.01121088	0.166655697	NA	NA	0.1642164	52.83040659	24.497248	28.3331586	NA
spring_2016	10_4	49	10	A	3IM	139.3592442	12.37597903	11.59348257	NA	0.082860845	NA	NA	0.699635618	126.9832652	62.17670485	64.80656032	NA
spring_2016	10_5	50	10	A	1CF	94.20360739	21.76577891	15.94549048	NA	0.430987219	NA	5.389301216	NA	72.43782848	29.15543267	43.28239581	NA
fall_2016	1_1	1	1	A	4EM	44.67138497	20.72869121	8.35277821	11.00676855	NA	NA	1.369144455	NA	12.43945815	12.43945815	NA	11.50323561
fall_2016	1_2	2	1	A	1CF	57.34386872	1.843935803	NA	NA	NA	0.260367821	1.583567982	NA	50.93586547	8.160324641	42.77554083	4.564067444
fall_2016	1_3	3	1	A	5EP	35.33091879	0.104014241	NA	NA	NA	NA	0.104014241	NA	31.03668965	18.42578331	12.61090634	4.190214895
fall_2016	1_4	4	1	A	2OF	103.2379035	4.707808712	3.713060393	NA	NA	0.622288535	0.372459785	NA	86.90747624	17.5513127	69.35616354	11.62261853
fall_2016	1_5	5	1	A	3IM	78.88551416	3.21487283	NA	NA	2.894240317	0.320632513	NA	NA	72.94269906	42.41847353	30.52422553	2.727942267
fall_2016	2_1	6	2	F	3IM	34.13521433	7.245629096	2.164178503	NA	1.628500587	1.804204101	1.648745906	NA	21.22359606	7.210923227	14.01267283	5.66598918
fall_2016	2_2	7	2	F	5EP	64.7707633	2.189516589	2.189516589	NA	NA	NA	NA	NA	48.37777552	21.55501447	26.82276105	14.20347119
fall_2016	2_3	8	2	F	2OF	32.73456688	10.42010183	0.65643739	4.452905327	NA	0.205207039	5.105552074	NA	17.42348691	2.471631545	14.95185537	4.890978135
fall_2016	2_4	9	2	F	1CF	8.588789475	NA	NA	NA	NA	NA	NA	NA	8.168614202	4.401554136	3.767060065	0.420175274
fall_2016	2_5	10	2	F	4EM	117.1417203	26.0237831	12.84337809	12.59186506	NA	0.58853994	NA	NA	72.9495649	64.9635975	7.985967398	18.16837232
fall_2016	3_1	11	3	A	1CF	28.44632443	2.455790766	0.523923729	1.163588856	0.768278181	NA	NA	NA	14.4440927	14.4440927	NA	11.54644097
fall_2016	3_2	12	3	A	2OF	20.07172611	3.041459095	1.354219926	NA	1.687239169	NA	NA	NA	15.60386192	13.31792803	2.285933888	1.4264051
fall_2016	3_3	13	3	A	3IM	68.89805866	18.98236005	1.827191547	16.11606592	0.104772556	0.934330027	NA	NA	36.0608066	15.99617437	20.06463223	13.85489201
fall_2016	3_4	14	3	A	4EM	47.50421037	5.426171016	NA	3.977060742	0.610981888	0.245421677	0.592706709	NA	37.34786805	11.50906329	25.83880476	4.730171305
fall_2016	3_5	15	3	A	5EP	85.32488732	16.18739424	3.492669234	12.02836766	0.666357344	NA	NA	NA	63.58989557	25.45046213	38.13943344	5.547597503
fall_2016	4_1	16	4	F	1CF	43.52198192	10.09320335	6.16105559	NA	0.104014241	NA	2.518422816	1.309710701	23.32503303	11.79445945	11.53057359	10.10374553
fall_2016	4_2	17	4	F	2OF	8.273964778	NA	NA	NA	NA	NA	NA	NA	3.877105365	3.877105365	NA	4.396859414
fall_2016	4_3	18	4	F	3IM	74.51634552	17.53615376	NA	13.1103161	2.487014265	0.66032198	1.278501414	NA	40.61218169	31.43704119	9.175140495	16.36801008
fall_2016	4_4	19	4	F	4EM	187.7795861	26.23876047	17.33137356	7.661503209	0.406082195	0.133257581	0.706543933	NA	139.8960008	28.29485403	111.6011468	21.64482481
fall_2016	4_5	20	4	F	5EP	47.1247563	4.781369138	NA	NA	4.781369138	NA	NA	NA	22.24862565	15.27083072	6.977794936	20.09476151
fall_2016	5_1	21	5	A	2OF	40.97992128	NA	NA	NA	NA	NA	NA	NA	36.04329608	2.403584849	33.63971123	4.936625195
fall_2016	5_2	22	5	A	3IM	150.1409779	56.66951562	43.68256105	8.404189898	2.922956994	0.95464848	0.7051592	NA	73.26970513	37.62371239	35.64599274	20.20175712
fall_2016	5_3	23	5	A	1CF	25.83515635	2.520086722	2.520086722	NA	NA	NA	NA	NA	15.86925461	3.089059841	12.78019477	7.445815016
fall_2016	5_4	24	5	A	5EP	105.0370973	11.9470566	6.180259983	3.385515798	1.66587422	0.064381941	NA	0.651024653	86.31761949	30.23794507	56.07967442	6.77242126
fall_2016	5_5	25	5	A	4EM	128.6912499	6.632969926	0.869883617	3.740592046	1.432560172	0.260367821	0.32956627	NA	102.9612916	25.60648748	77.35480408	19.0969884
fall_2016	6_1	26	5	F	5EP	10.90235199	0.237331359	NA	NA	0.237331359	NA	NA	NA	8.845546656	8.845546656	NA	1.819473973
fall_2016	6_2	27	5	F	1CF	28.25883635	1.71325849	1.71325849	NA	NA	NA	NA	NA	21.04013041	12.40433915	8.635791255	5.505447452
fall_2016	6_3	28	5	F	4EM	33.64411157	5.796778865	NA	4.671742808	1.004695879	0.120340177	NA	NA	25.53387999	9.13422544	16.39965455	2.313452717
fall_2016	6_4	29	5	F	2OF	64.71703817	12.35858156	4.967865795	5.712651844	1.678063917	NA	NA	NA	47.27203197	20.73707025	26.53496172	5.086424647
fall_2016	6_5	30	5	F	3IM	53.29439433	5.080328168	1.759321048	NA	2.193125726	1.127881394	NA	NA	46.21158903	39.70289743	6.508691601	2.002477133
fall_2016	7_1	31	7	F	2OF	16.15883433	NA	NA	NA	NA	NA	NA	NA	14.52351629	7.656154627	6.867361664	1.635318037
fall_2016	7_2	32	7	F	4EM	48.1184357	1.916398903	1.602358471	NA	NA	0.314040432	NA	NA	45.5816564	3.60119753	41.98045887	0.620380388
fall_2016	7_3	33	7	F	5EP	31.40700948	4.610191892	1.614211607	0.482756406	2.513223879	NA	NA	NA	25.88615017	21.53086921	4.355280962	0.910667417
fall_2016	7_4	34	7	F	3IM	66.81232921	11.79781942	NA	9.02350247	2.084013087	0.068015333	0.622288535	NA	52.05624421	28.60339774	23.45284647	2.958265573
fall_2016	7_5	35	7	F	1CF	6.101951506	2.242646947	0.547620263	1.695026684	NA	NA	NA	NA	3.859304559	1.163675303	2.695629256	NA
fall_2016	8_1	36	8	A	3IM	129.868721	8.251362948	NA	4.299769312	3.106286936	0.674953887	0.170352812	NA	71.76781705	24.30956206	47.45825499	49.84954103
fall_2016	8_2	37	8	A	5EP	121.8486814	17.40377175	3.56225063	9.131410033	1.659798203	NA	3.05031288	NA	59.51049386	35.07635454	24.43413932	44.93441582
fall_2016	8_3	38	8	A	4EM	76.20789467	8.223498924	5.579207918	2.644291006	NA	NA	NA	NA	52.1468571	40.0120616	12.1347955	15.83753865
fall_2016	8_4	39	8	A	1CF	30.94446848	8.381897273	2.512517674	4.864399925	NA	NA	1.004979674	NA	18.79428999	10.8790268	7.915263183	3.768281222
fall_2016	8_5	40	8	A	2OF	20.29027547	3.281132503	2.366159403	0.581794428	0.333178672	NA	NA	NA	17.00914297	8.480481379	8.528661588	NA
fall_2016	9_1	41	9	F	4EM	60.59703802	6.419745289	0.627458779	3.592049169	2.200237342	NA	NA	NA	43.20054627	31.98977854	11.21076773	10.97674646
fall_2016	9_2	42	9	F	3IM	66.26259744	14.68500745	NA	10.67962679	3.80152671	0.203853952	NA	NA	42.58129012	25.47221267	17.10907744	8.996299874
fall_2016	9_3	43	9	F	1CF	13.34451355	0.16300437	NA	NA	NA	NA	0.16300437	NA	13.18150918	9.827065645	3.354443539	NA
fall_2016	9_4	44	9	F	5EP	91.86446986	20.18707875	2.033359321	13.6494747	1.360353912	1.215829934	1.183547367	0.744513515	56.91787949	44.2233611	12.69451839	14.75951162
fall_2016	9_5	45	9	F	2OF	14.88153154	0.197525595	NA	NA	NA	NA	0.197525595	NA	7.0279154	7.0279154	NA	7.656090542
fall_2016	10_1	46	10	A	5EP	95.70802405	22.37496355	NA	9.987832817	NA	NA	12.38713073	NA	55.16395172	18.38699314	36.77695858	18.16910878
fall_2016	10_2	47	10	A	4EM	129.6603291	30.74141726	2.389724252	28.3076522	NA	0.044040812	NA	NA	93.52784832	34.28463396	59.24321435	5.391063509
fall_2016	10_3	48	10	A	2OF	49.53615613	4.489161393	2.304892887	NA	NA	NA	2.184268506	NA	30.9929144	18.26705576	12.72585864	14.05408034
fall_2016	10_4	49	10	A	3IM	104.4353639	44.61396805	3.584586379	37.4501874	NA	0.477659333	0.663660524	2.437874415	41.67061296	41.67061296	NA	18.15078293
fall_2016	10_5	50	10	A	1CF	92.69839328	9.335818756	2.233540546	6.363461698	NA	0.738816512	NA	NA	81.23371177	59.99349522	21.24021655	2.128862753
